# Supplementary material
Source: PubMed Central journal article supplement (PMC3318275)
Supplement: supp_19.4.527_CVI-CVI05653-11-s01.pdf [file supp_19.4.527_CVI-CVI05653-11-s01.pdf]

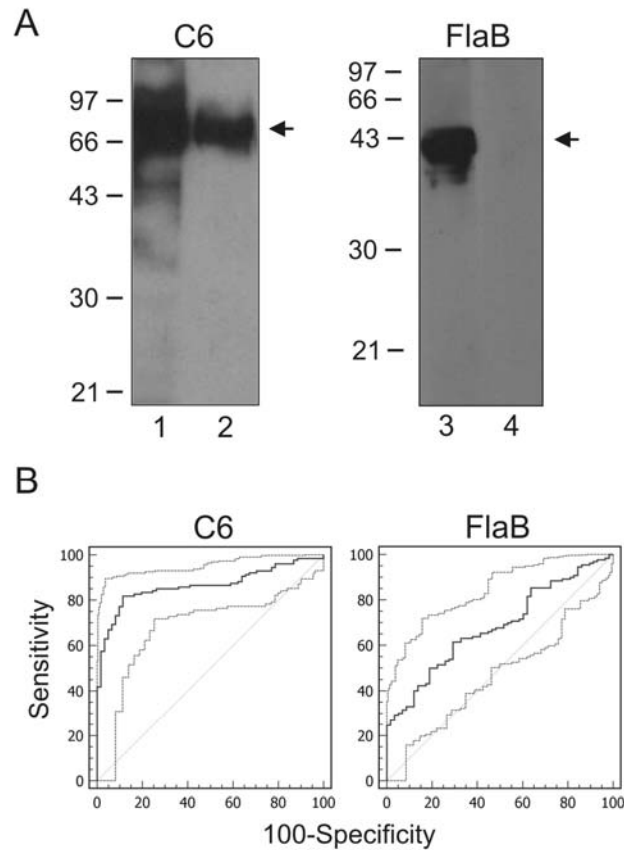

**Supplementary Figure 1: Western blot and ROC-curve analysis of *B. burgdorferi* C6 and FlaB antigens.** (A) Two C6 peptides were synthesized and coupled to BSA and recombinant FlaB antigen was expressed in *E.coli*. The proteins were run on 12% SDS-gels under reducing conditions and blotted to Western blot membranes. Membranes were incubated first with canine serum and then with an alkaline phosphatase conjugated anti-canine IgG antibody followed by chemiluminescence substrate. Left panel: The BSA coupled C6-P1 peptide originating from *B. burgdorferi* strain B31 (1) and C6-P2 originating from strain 297 (2) were run on the gel and incubated with a pretested positive canine serum; Right panel: FlaB antigen was run on the gel and incubated with a positive (3) and a negative (4) canine serum. (B) ROC curves were obtained for C6-P1 and FlaB by comparison of multiplex assay results with those obtained by Western blotting using whole bacteria lysates. A total of 188 canine sera were used for the analysis. Western blot results were considered positive if the 39 kDa (VlsE containing the C6 region) or 41 kDa (FlaB) bands were detected by the respective serum. Areas under the curves were 0.865 for C6-P1 and 0.682 for FlaB.

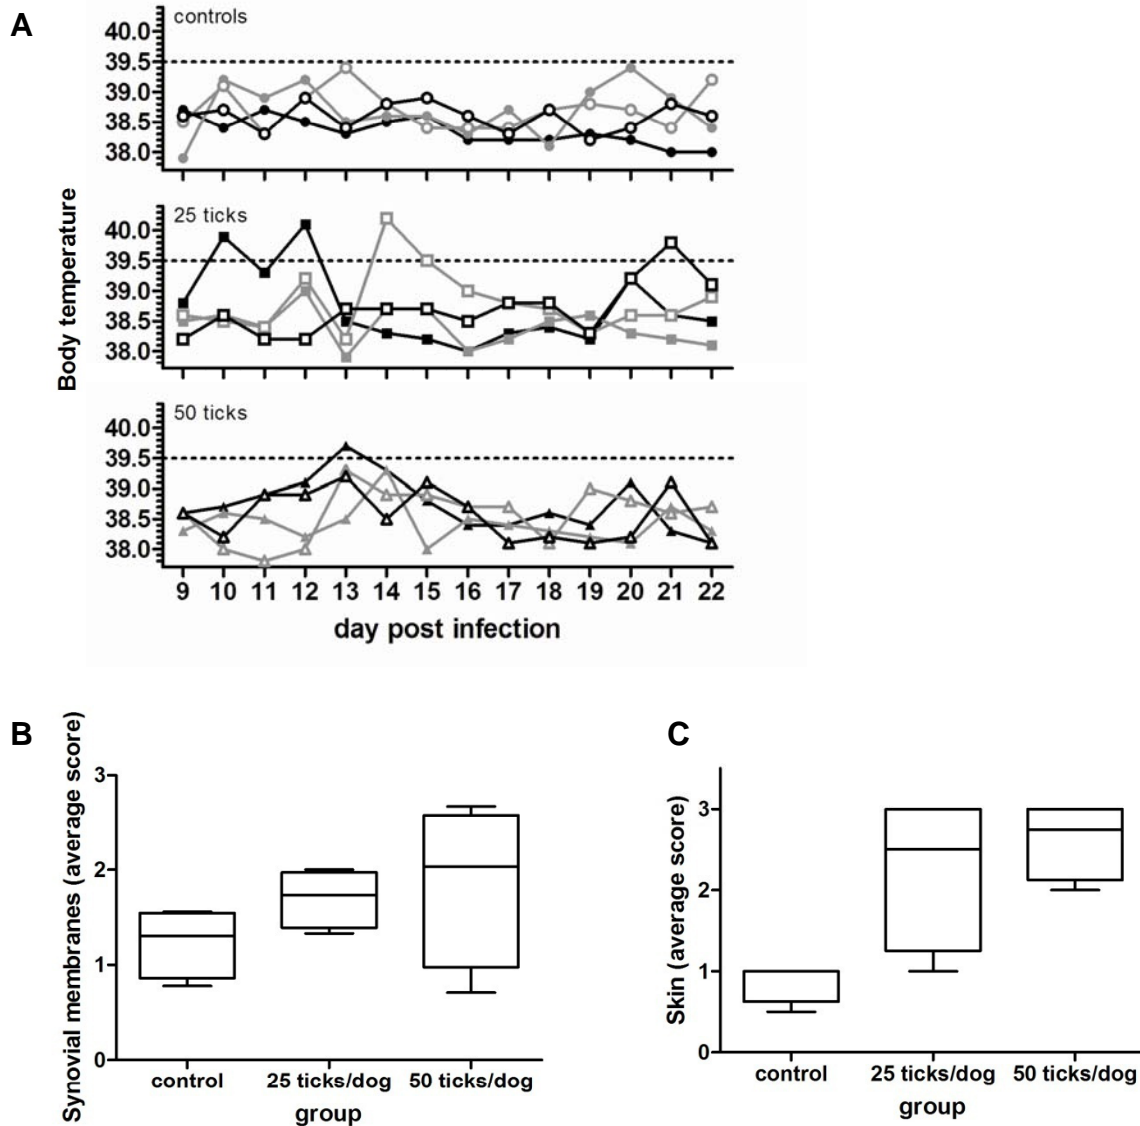

**Supplementary Figure 2: Clinical data and tissue pathology in dogs**

**experimentally infected with *B. burgdorferi*.** Dogs were either exposed to 25 (n=4) or 50 infected ticks (n=4) or were not exposed (controls; n=4) and were kept in the study until day 92 after tick exposure. (A) Body temperature was measured daily and is shown for days 9 to 22 p.i.; (B) Histological changes in synovial membranes on day 92. The average score for each dog was calculated from ten individual scores (five different joints, both sites); (C) Histological signs of skin inflammation and dermatitis on day 92 were determined in skin regions close to the tick attachment sites. The average score for each dog is the mean score from both sites.

**Supplementary Table 1:** Mean fluorescence intensity (MFI) values for antibodies to OspC, OspF and OspA determined by multiplex analysis in individual serum samples from dogs experimentally infected with *B. burgdorferi*.

| Antibodies to | Group    | Dog | Day 13 prior to infection | Day post infection |            |            |            |            |            |
|---------------|----------|-----|---------------------------|--------------------|------------|------------|------------|------------|------------|
|               |          |     |                           | 21                 | 35         | 49         | 63         | 77         | 93         |
| OspC          | control  | 1   | <i>35</i>                 | <i>32</i>          | <i>35</i>  | <i>19</i>  | <i>175</i> | <i>250</i> | <i>192</i> |
|               |          | 2   | <i>38</i>                 | <i>40</i>          | <i>50</i>  | <i>32</i>  | <i>73</i>  | <i>46</i>  | <i>131</i> |
|               |          | 3   | <i>7</i>                  | <i>30</i>          | <i>51</i>  | <i>23</i>  | <i>39</i>  | <i>25</i>  | <i>26</i>  |
|               |          | 4   | <i>26</i>                 | <i>36</i>          | <i>20</i>  | <i>30</i>  | <i>31</i>  | <i>35</i>  | <i>40</i>  |
|               | 25 ticks | 5   | <i>20</i>                 | 1324               | 5611       | 10434      | 9632       | 6336       | 5325       |
|               |          | 6   | <i>13</i>                 | 747                | 8875       | 9964       | 8864       | 8729       | 6631       |
|               |          | 7   | <i>28</i>                 | 443                | 9256       | 12590      | 7195       | 8571       | 4380       |
|               |          | 8   | <i>16</i>                 | 528                | 3644       | 3375       | 3192       | 4351       | 5760       |
|               | 50 ticks | 9   | <i>20</i>                 | 2925               | 9206       | 11992      | 7229       | 7345       | 4963       |
|               |          | 10  | <i>19</i>                 | 3819               | 9052       | 10527      | 17155      | 22611      | 20905      |
|               |          | 11  | <i>32</i>                 | 3867               | 2601       | 6130       | 8189       | 11433      | 6249       |
|               |          | 12  | <i>33</i>                 | 3692               | 10482      | 7674       | 7167       | 5262       | 4797       |
| OspF          | control  | 1   | <i>77</i>                 | <i>85</i>          | <i>131</i> | <i>81</i>  | <i>323</i> | <i>496</i> | <i>401</i> |
|               |          | 2   | <i>231</i>                | <i>271</i>         | <i>200</i> | <i>127</i> | <i>198</i> | <i>204</i> | <i>338</i> |
|               |          | 3   | <i>44</i>                 | <i>116</i>         | <i>135</i> | <i>92</i>  | <i>118</i> | <i>117</i> | <i>118</i> |
|               |          | 4   | <i>50</i>                 | <i>75</i>          | <i>96</i>  | <i>116</i> | <i>118</i> | <i>137</i> | <i>145</i> |
|               | 25 ticks | 5   | <i>106</i>                | 196                | 1656       | 4462       | 8736       | 6309       | 6945       |
|               |          | 6   | <i>69</i>                 | 290                | 1540       | 3620       | 4142       | 5998       | 6899       |
|               |          | 7   | <i>70</i>                 | 223                | 444        | 1356       | 2919       | 2677       | 5421       |
|               |          | 8   | <i>159</i>                | 194                | 358        | 2235       | 2053       | 4580       | 6020       |
|               | 50 ticks | 9   | <i>50</i>                 | 401                | 3182       | 3889       | 3421       | 6311       | 10867      |
|               |          | 10  | <i>77</i>                 | 397                | 580        | 2235       | 5869       | 8467       | 10820      |
|               |          | 11  | <i>98</i>                 | 987                | 2718       | 6282       | 8322       | 11688      | 17052      |
|               |          | 12  | <i>135</i>                | 847                | 1662       | 5364       | 6326       | 8375       | 7802       |
| OspA          | control  | 1   | <i>146</i>                | <i>254</i>         | <i>383</i> | <i>154</i> | <i>344</i> | <i>406</i> | <i>405</i> |
|               |          | 2   | <i>352</i>                | <i>232</i>         | <i>202</i> | <i>137</i> | <i>209</i> | <i>242</i> | <i>506</i> |
|               |          | 3   | <i>79</i>                 | <i>91</i>          | <i>110</i> | <i>77</i>  | <i>95</i>  | <i>155</i> | <i>136</i> |
|               |          | 4   | <i>121</i>                | <i>132</i>         | <i>112</i> | <i>106</i> | <i>153</i> | <i>184</i> | <i>234</i> |
|               | 25 ticks | 5   | <i>115</i>                | 804                | 595        | 355        | 573        | 1009       | 624        |
|               |          | 6   | <i>86</i>                 | 839                | 164        | 181        | 161        | 199        | 193        |
|               |          | 7   | <i>156</i>                | 5521               | 1063       | 324        | 170        | 193        | 221        |
|               |          | 8   | <i>71</i>                 | 273                | 341        | 163        | 231        | 254        | 203        |
|               | 50 ticks | 9   | <i>59</i>                 | 1407               | 303        | 186        | 237        | 261        | 364        |
|               |          | 10  | <i>91</i>                 | 1270               | 241        | 259        | 466        | 457        | 804        |
|               |          | 11  | <i>150</i>                | 2369               | 365        | 305        | 242        | 297        | 268        |
|               |          | 12  | <i>173</i>                | 3466               | 917        | 524        | 558        | 754        | 620        |

The positive cut-off values for antibodies to OspC and OspA are  $\geq 1000$  and for OspF  $\geq 1500$ . MFI values below the positive cut-off value are shown in italics.

**Supplementary Table 2:** Mean fluorescence intensity (MFI) values for antibodies to C6-P1, C6-P2 and FlaB determined by multiplex analysis in individual serum samples from dogs experimentally infected with *B. burgdorferi*.

| Antibodies to | Group    | Dog | Day 13 prior to infection | Day post infection |             |              |              |              |              |
|---------------|----------|-----|---------------------------|--------------------|-------------|--------------|--------------|--------------|--------------|
|               |          |     |                           | 21                 | 35          | 49           | 63           | 77           | 93           |
| C6-P1         | control  | 1   | <i>77</i>                 | <i>70</i>          | <i>56</i>   | <i>16</i>    | <i>312</i>   | <i>213</i>   | <i>170</i>   |
|               |          | 2   | <i>108</i>                | <i>107</i>         | <i>91</i>   | <i>44</i>    | <i>128</i>   | <i>93</i>    | <i>117</i>   |
|               |          | 3   | <i>30</i>                 | <i>105</i>         | <i>63</i>   | <i>27</i>    | <i>78</i>    | <i>13</i>    | <i>30</i>    |
|               |          | 4   | <i>65</i>                 | <i>42</i>          | <i>26</i>   | <i>13</i>    | <i>83</i>    | <i>65</i>    | <i>56</i>    |
|               | 25 ticks | 5   | <i>40</i>                 | <i>189</i>         | <i>3072</i> | <i>3971</i>  | <i>6326</i>  | <i>6556</i>  | <i>12634</i> |
|               |          | 6   | <i>37</i>                 | <i>229</i>         | <i>917</i>  | <i>2656</i>  | <i>3070</i>  | <i>3491</i>  | <i>4885</i>  |
|               |          | 7   | <i>163</i>                | <i>334</i>         | <i>2195</i> | <i>2652</i>  | <i>5486</i>  | <i>5398</i>  | <i>6504</i>  |
|               |          | 8   | <i>58</i>                 | <i>707</i>         | <i>2200</i> | <i>4190</i>  | <i>8134</i>  | <i>10578</i> | <i>11641</i> |
|               | 50 ticks | 9   | <i>33</i>                 | <i>1238</i>        | <i>3757</i> | <i>3803</i>  | <i>3119</i>  | <i>4715</i>  | <i>6204</i>  |
|               |          | 10  | <i>101</i>                | <i>617</i>         | <i>1768</i> | <i>2205</i>  | <i>4004</i>  | <i>7357</i>  | <i>9074</i>  |
|               |          | 11  | <i>69</i>                 | <i>2452</i>        | <i>5698</i> | <i>7788</i>  | <i>5813</i>  | <i>6861</i>  | <i>7658</i>  |
|               |          | 12  | <i>83</i>                 | <i>1647</i>        | <i>5683</i> | <i>10841</i> | <i>11840</i> | <i>13674</i> | <i>11161</i> |
| C6-P2         | control  | 1   | <i>61</i>                 | <i>73</i>          | <i>57</i>   | <i>23</i>    | <i>260</i>   | <i>158</i>   | <i>102</i>   |
|               |          | 2   | <i>49</i>                 | <i>78</i>          | <i>74</i>   | <i>43</i>    | <i>94</i>    | <i>52</i>    | <i>71</i>    |
|               |          | 3   | <i>18</i>                 | <i>77</i>          | <i>50</i>   | <i>28</i>    | <i>47</i>    | <i>30</i>    | <i>36</i>    |
|               |          | 4   | <i>44</i>                 | <i>31</i>          | <i>34</i>   | <i>33</i>    | <i>65</i>    | <i>45</i>    | <i>54</i>    |
|               | 25 ticks | 5   | <i>33</i>                 | <i>190</i>         | <i>1460</i> | <i>2307</i>  | <i>5758</i>  | <i>6286</i>  | <i>10408</i> |
|               |          | 6   | <i>38</i>                 | <i>521</i>         | <i>1063</i> | <i>1576</i>  | <i>1814</i>  | <i>2028</i>  | <i>3366</i>  |
|               |          | 7   | <i>40</i>                 | <i>329</i>         | <i>923</i>  | <i>1914</i>  | <i>1958</i>  | <i>2658</i>  | <i>3010</i>  |
|               |          | 8   | <i>24</i>                 | <i>60</i>          | <i>209</i>  | <i>501</i>   | <i>1608</i>  | <i>2266</i>  | <i>2915</i>  |
|               | 50 ticks | 9   | <i>28</i>                 | <i>1210</i>        | <i>1368</i> | <i>1279</i>  | <i>1093</i>  | <i>1715</i>  | <i>1951</i>  |
|               |          | 10  | <i>29</i>                 | <i>365</i>         | <i>1758</i> | <i>2207</i>  | <i>3468</i>  | <i>4680</i>  | <i>5180</i>  |
|               |          | 11  | <i>47</i>                 | <i>585</i>         | <i>583</i>  | <i>1419</i>  | <i>1404</i>  | <i>1869</i>  | <i>2302</i>  |
|               |          | 12  | <i>60</i>                 | <i>582</i>         | <i>2292</i> | <i>3971</i>  | <i>4848</i>  | <i>7257</i>  | <i>6409</i>  |
| FlaB          | control  | 1   | <i>570</i>                | <i>224</i>         | <i>348</i>  | <i>297</i>   | <i>478</i>   | <i>778</i>   | <i>673</i>   |
|               |          | 2   | <i>741</i>                | <i>477</i>         | <i>986</i>  | <i>719</i>   | <i>590</i>   | <i>1419</i>  | <i>2519</i>  |
|               |          | 3   | <i>39</i>                 | <i>229</i>         | <i>396</i>  | <i>370</i>   | <i>256</i>   | <i>192</i>   | <i>176</i>   |
|               |          | 4   | <i>122</i>                | <i>172</i>         | <i>253</i>  | <i>277</i>   | <i>251</i>   | <i>292</i>   | <i>355</i>   |
|               | 25 ticks | 5   | <i>333</i>                | <i>762</i>         | <i>1898</i> | <i>6241</i>  | <i>7095</i>  | <i>5907</i>  | <i>5786</i>  |
|               |          | 6   | <i>47</i>                 | <i>1488</i>        | <i>2238</i> | <i>3088</i>  | <i>3492</i>  | <i>4967</i>  | <i>6557</i>  |
|               |          | 7   | <i>115</i>                | <i>574</i>         | <i>2457</i> | <i>6932</i>  | <i>8559</i>  | <i>6317</i>  | <i>6580</i>  |
|               |          | 8   | <i>177</i>                | <i>695</i>         | <i>1726</i> | <i>5232</i>  | <i>9204</i>  | <i>13150</i> | <i>13040</i> |
|               | 50 ticks | 9   | <i>294</i>                | <i>1415</i>        | <i>5788</i> | <i>8910</i>  | <i>7395</i>  | <i>6775</i>  | <i>6676</i>  |
|               |          | 10  | <i>143</i>                | <i>1428</i>        | <i>4743</i> | <i>9856</i>  | <i>13899</i> | <i>13323</i> | <i>10577</i> |
|               |          | 11  | <i>253</i>                | <i>4207</i>        | <i>6256</i> | <i>15629</i> | <i>12861</i> | <i>13830</i> | <i>10886</i> |
|               |          | 12  | <i>227</i>                | <i>4116</i>        | <i>9922</i> | <i>14993</i> | <i>15890</i> | <i>15380</i> | <i>12580</i> |

The positive cut-off values for antibodies to C6-P1 and FlaB are  $\geq 1500$  and for C6-P2  $\geq 1000$ . MFI values below the positive cut-off value are shown in italics.

**Supplementary Table 3:** Quant<sup>®</sup> C6 ELISA antibody values (U/ml) for individual serum samples from dogs experimentally infected with *B. burgdorferi*.

| Group    | Dog | Day 13 prior<br>to infection | Day post infection |     |     |     |     |     |
|----------|-----|------------------------------|--------------------|-----|-----|-----|-----|-----|
|          |     |                              | 21                 | 35  | 49  | 63  | 77  | 93  |
| control  | 1   | 34                           | 12                 | 0   | 0   | 0   | 0   | 0   |
|          | 2   | 0                            | 0                  | 0   | 0   | 0   | 0   | 0   |
|          | 3   | 0                            | 0                  | 0   | 0   | 0   | 0   | 0   |
|          | 4   | 0                            | 0                  | 0   | 0   | 0   | 0   | 10  |
| 25 ticks | 5   | 0                            | 26                 | 256 | 338 | 349 | 355 | 143 |
|          | 6   | 0                            | 28                 | 70  | 288 | 172 | 253 | 175 |
|          | 7   | 0                            | 47                 | 177 | 279 | 246 | 252 | 386 |
|          | 8   | 0                            | 40                 | 100 | 252 | 253 | 269 | 230 |
| 50 ticks | 9   | 0                            | 101                | 253 | 327 | 183 | 185 | 106 |
|          | 10  | 0                            | 57                 | 66  | 242 | 379 | 305 | 168 |
|          | 11  | 0                            | 153                | 183 | 257 | 219 | 231 | 272 |
|          | 12  | 26                           | 44                 | 201 | 312 | 304 | 384 | 370 |

The positive cut-off value for antibodies to C6 in this ELISA is  $\geq 30$ U/ml. Values below the positive cut-off value are shown in italics.
